# Supplementary material for: Mucoadhesive Chitosan Delivery System with Chelidonii Herba Lyophilized Extract as a Promising Strategy for Vaginitis Treatment
Source: PubMed Central journal article supplement (PMC7230236; doi:10.3390/jcm9041208), 2020-04-22
Supplement: jcm-09-01208-s001.pdf [file jcm-09-01208-s001.pdf]

**Table 1.** Validation parameters

| Parameter                                               | Results                            |                                    |                                    |                                    |
|---------------------------------------------------------|------------------------------------|------------------------------------|------------------------------------|------------------------------------|
|                                                         | Methanol                           |                                    | Phosphate buffer                   |                                    |
|                                                         | Chelidonine                        | Sanguinarine                       | Chelidonine                        | Sanguinarine                       |
| Linearity: $y = ax + b$                                 |                                    |                                    |                                    |                                    |
| $a \pm S_a$                                             | 0.0122 ±<br>0.0003                 | 0.7778 ±<br>0.0064                 | 0.0882 ±<br>0.0012                 | 0.6666 ±<br>0.0057                 |
| $b \pm S_b$                                             | insignificant<br>( $\alpha=0.05$ ) | insignificant<br>( $\alpha=0.05$ ) | insignificant<br>( $\alpha=0.05$ ) | insignificant<br>( $\alpha=0.05$ ) |
| Correlation coefficient ( $r$ )                         | 0.9997                             | 0.9999                             | 0.9999                             | 0.9999                             |
| Range of linearity [ $\mu\text{g mL}^{-1}$ ]            | 10.0–300.0                         | 10.0–300.0                         | 10.0–300.0                         | 10.0–300.0                         |
| Intra-day precision, RSD (<5% required)                 |                                    |                                    |                                    |                                    |
| 50 [ $\mu\text{g mL}^{-1}$ ]                            | 0.8456                             | 2.1580                             | 1.5503                             | 1.9230                             |
| 100 [ $\mu\text{g mL}^{-1}$ ]                           | 1.2598                             | 2.6760                             | 0.8952                             | 2.0518                             |
| 200 [ $\mu\text{g mL}^{-1}$ ]                           | 0.4932                             | 0.8348                             | 2.4732                             | 1.4568                             |
| Inter-day precision                                     |                                    |                                    |                                    |                                    |
| 50 [ $\mu\text{g mL}^{-1}$ ]                            | 1.5175                             | 2.6964                             | 2.8871                             | 0.7888                             |
| 100 [ $\mu\text{g mL}^{-1}$ ]                           | 0.5162                             | 1.4558                             | 3.2923                             | 2.9489                             |
| 200 [ $\mu\text{g mL}^{-1}$ ]                           | 0.8493                             | 0.3817                             | 1.9178                             | 1.8711                             |
| Limit of detection (LOD) [ $\mu\text{g mL}^{-1}$ ]      | 8.99                               | 2.68                               | 4.58                               | 2.79                               |
| Limit of quantification (LOQ) [ $\mu\text{g mL}^{-1}$ ] | 27.27                              | 8.14                               | 13.88                              | 8.45                               |

$S_a$  standard deviation of the slope;  $S_b$  standard deviation of intercept,  $t$ , calculated values of Student's t-test,  $t_{\alpha, f} = 2.228$  critical values of Student's test for degrees of freedom  $f = 10$  and significance level  $\alpha = 0.05$ .
